Baltayeva *et al*

**Obesogenic diet exposure alters uterine natural killer cell biology and impairs vasculature remodeling in mice**

Jennet Baltayeva<sup>1,2</sup>, Chaini Konwar<sup>1,3</sup>, Barbara Castellana<sup>1,2</sup>, Danielle L. Mara<sup>1</sup>, Julian K. Christians<sup>1,4</sup>, Alexander G. Beristain<sup>1,2</sup>

<sup>1</sup> British Columbia Children’s Hospital Research Institute, Vancouver, Canada.

<sup>2</sup> Department of Obstetrics & Gynecology, The University of British Columbia, Vancouver, Canada.

<sup>3</sup> Department of Medical Genetics, The University of British Columbia, Vancouver, Canada.

<sup>4</sup> Department of Biological Sciences, Simon Fraser University, Burnaby, Canada.

**Running Title:** Effects of obesogenic diet on uterine natural killer (uNK) cell biology

To whom correspondence should be addressed: Alexander G. Beristain, British Columbia Children’s Hospital Research Institute, Department of Obstetrics & Gynecology, The University of British Columbia, Vancouver, British Columbia, Canada. V5Z 4H4. Tel: (604) 875-3573; E-mail: [aberista@mail.ubc.ca](mailto:aberista@mail.ubc.ca)

**Keywords:** Pregnancy, natural killer cell, uterus, decidua, placenta, diet-induced obesity, spiral artery remodeling, high-fat/high-sucrose diet, gene expression, gene microarray

**Funding:** This work was supported by a BC Children’s Hospital Healthy Starts Catalyst Grant (to AGB and JKC) and a Canadian Institutes of Health Research Open Operating Grant (201403MOP-325905-CIA-CAAA) (to AGB).

Baltayeva *et al*

1 **ABSTRACT**

2 Pre-pregnancy obesity associates with adverse reproductive outcomes that impact maternal and fetal  
3 health. While obesity-driven mechanisms linked to poor pregnancy outcomes remain unclear, it is  
4 possible that obesity affects local uterine immune cells. Uterine immune cells, particularly uterine  
5 natural killer cells (uNK), play central roles in orchestrating developmental events in pregnancy.  
6 However, the effect of obesity on uNK biology is poorly understood. Using a high fat/high sugar diet  
7 (HFD) obesogenic mouse model, we set out to examine the effects of maternal obesity on uNK  
8 composition and establishment of the maternal-fetal interface. HFD exposure resulted in weight gain-  
9 dependent increases in systemic inflammation and rates of fetal resorption. Within HFD mice, both  
10 weight gain-dependent (diet-induced obese; DIO) and -independent (DIO-resistant; DIO-R) effects on  
11 natural cytotoxicity receptor-1 frequency and uNK activity were observed. Importantly, HFD-  
12 associated changes in uNK coincided with impairments in uterine artery remodeling in mid but not late  
13 pregnancy. Comparison of uNK mRNA transcripts in control diet mice to gene signatures in DIO or  
14 DIO-R identified differentially expressed genes that play roles in promoting activity/cytotoxicity and  
15 impeding vascular biology. Together, this work provides new insight into how obesity, and particularly  
16 how diet-induced weight-gain, may impact uNK-processes important in pregnancy.

17

Baltayeva *et al*

## 1 INTRODUCTION

2 Obesity affects more than half a billion adults worldwide and has become a global epidemic<sup>1</sup>.  
3 Consistent with trends in the general population, rates of obesity among women of childbearing age are  
4 increasing<sup>2-4</sup>. Pre-pregnancy obesity is recognized as a high-risk state because of its association with  
5 multiple adverse obstetric and perinatal outcomes including miscarriage, preeclampsia, preterm birth,  
6 and intrauterine fetal demise<sup>5,6</sup>. Providing the interface between the mother and developing baby, the  
7 conceptus-derived placenta plays an essential role in the transfer of nutrients and gases between  
8 maternal and fetal circulation. Importantly, placenta development and fetal health is impaired in obese  
9 women<sup>7,8</sup>. In rodent models of obesity, obesogenic diets promote placental dysfunction, defined in part  
10 by defects in utero-placental vascularization and altered trophoblast maturation<sup>9-11</sup>. However, the  
11 cellular and molecular processes affected by obesity that underlie detrimental obesity-related  
12 pregnancy outcomes are poorly understood.

13 Optimal placental function and overall pregnancy success is largely dependent upon tightly  
14 regulated angiogenic and vascular remodeling programs that take place within the maternal-fetal  
15 interface<sup>12,13</sup>. Early stages of uterine blood vessel growth, branching, pruning, and remodeling are  
16 controlled by diverse populations of leukocytes that reside within the decidual microenvironment<sup>14,15</sup>.  
17 In early human and mouse pregnancy, uterine natural killer cells (uNK) constitute the most abundant  
18 immune cell subtype within the uterine mucosa<sup>16-18</sup>. Genetic studies in mice show that uNK are major  
19 contributors to uterine vascular growth and remodeling, where these uNK-related processes are  
20 mediated in part by the production of pro-angiogenic factors (i.e. vascular endothelial growth factor;  
21 VEGF) and tissue-remodeling cytokines (i.e. tumor necrosis factor- $\alpha$ ; TNF- $\alpha$ , type-II interferon)<sup>19-21</sup>.

22 Obesity associates with adipose tissue immune cell infiltration, including macrophages, T and B  
23 lymphocytes, mast cells, and neutrophils<sup>22-24</sup>, and along with these changes, obesogenic environments

Baltayeva *et al*

1 alter leukocyte activation by potentiating the secretion of pro-inflammatory cytokines that have effects  
2 within both local and distal tissues<sup>25</sup>. In women, previous work shows that uNK frequencies decrease in  
3 obesity<sup>26</sup>. Importantly, these cellular changes associate with increased rates of uNK degranulation,  
4 changes in natural killer receptor expression, and decreased production of pro-angiogenic VEGF-A<sup>27</sup>.  
5 While these findings provide insight into how maternal obesity affects uNK processes important in  
6 pregnancy, due to the heterogeneous nature of obesity within human populations, the need for a clearer  
7 understanding of how excess adiposity impacts uNK biology and how these changes affect pregnancy  
8 outcome is still needed.

9 In this study, we established a diet-based mouse model to investigate the impact of obesity on  
10 pregnancy outcome, uNK function, and placental development in early-mid pregnancy. Mice subjected  
11 to a chronic high-fat/high-sugar (HFD) diet showed increased levels of systemic inflammation and  
12 increased rates of fetal resorption. Notably, uNK composition within HFD mice was different than in  
13 mice fed a control diet, where alterations in state of uNK activity and receptor expression were  
14 observed. Notably, these uNK-related differences associated with uterine artery remodeling  
15 impairments within HFD mice. While diet exposure did not result in robust global gene expression  
16 changes in uNK, specific genes important in vascular biology, inflammation/cytotoxic activation, and  
17 metabolism were altered by HFD exposure. Together, our work provides novel insight into obesity-  
18 induced changes in uNK function. These findings also establish insight into immunological  
19 mechanisms impacted by maternal obesity that likely lead to alterations in utero-placental development  
20 in early-mid pregnancy which in turn may contribute to the development of obesity-linked pregnancy  
21 disorders.

22

23

24

Baltayeva *et al*

## 1 RESULTS

### 2 Diet-induced weight gain drives systemic inflammation and potentiates fetal resorption

3 To investigate the effects of maternal obesity on uNK biology and placental development,  
4 female C57BL/6J mice were fed either a control low-fat/no sucrose diet (LFD) or a HFD over a 13-  
5 week period prior to mating; exposure to these diets was also maintained during pregnancy (Figure  
6 1A). As expected, mice fed a HFD showed an increase in body weight (Figure 1B). However, there  
7 was considerable heterogeneity in endpoint body weight within the HFD cohort, where weight gain  
8 rates in ~37% of HFD mice (7/19) were indistinguishable from LFD controls (Figures 1C, 1D). This  
9 observation led us to sub-categorize mice within the HFD group as either weight-gainers (diet-induced  
10 obese mice; DIO) or as weight-gain resistant mice (DIO-resistant; DIO-R) (Figure 1C). Sub-  
11 categorization of DIO and DIO-R mice was established following the example of Enriori *et al*<sup>28</sup>, where  
12 mice with endpoint weights > 3 standard deviations to the mean LFD weight were categorized as DIO.  
13 Consistent with previous findings showing association of HFD-induced weight gain and increased  
14 systemic inflammation<sup>29,30</sup>, levels of pro-inflammatory TNF $\alpha$  in blood serum were higher in DIO mice  
15 than in LFD controls at gestational day (Gd)10.5 (Figure 1E). Notably, a statistical difference was not  
16 observed in TNF $\alpha$  serum levels between DIO-R and LFD mice, suggesting that the increase in TNF $\alpha$  is  
17 due to increased adiposity and not exposure to HFD *per se* (Figure 1E).

18 Neither HFD exposure nor increased weight gain led to differences in placental or fetal  
19 measurements, although a trend for DIO-R placentas to weigh less than control placentas was observed  
20 (Supplemental Figure 1A, B). However, HFD exposure led to moderate, but significant increases in the  
21 fetal resorption rate compared to control mice (18% vs. 5%), and this effect was primarily driven by the  
22 DIO subgroup (Figure 1F). Together, our mouse model of maternal obesity shows that HFD-induced  
23 weight gain in pregnancy correlates with increased systemic inflammation and impaired fetal viability.

Baltayeva *et al*

## 1 **High-fat diet exposure does not alter uNK frequencies in early pregnancy**

2 Uterine NK in mice are defined as “tissue-resident” Dolichos biflorus agglutinin  
3 (DBA)<sup>+</sup>CD49a<sup>+</sup>DX5<sup>+/-</sup> (tr-uNK) or “conventional” DBA<sup>-</sup>CD49a<sup>-</sup>DX5<sup>+</sup> (c-uNK), and these distinct  
4 subtypes play specific roles in uterine neo-angiogenesis (i.e. tr-uNK) and artery remodeling (i.e. c-  
5 uNK)<sup>31</sup>. In mid pregnancy, tr-uNK are the dominant uNK subtype comprising roughly 80% of all uNK,  
6 while c-uNK make up a smaller proportion<sup>32</sup>. To this end, we first investigated whether HFD exposure  
7 alters the number of tr-uNK in early pregnancy by histologically examining DBA<sup>+</sup> cells at Gd7.5 and  
8 Gd10.5 of pregnancy; at Gd7.5, uNK begin to expand in number and this expansion peaks by Gd10.5,  
9 at which point numbers subsequently decline<sup>33</sup>. While DBA<sup>+</sup> uNK in both HFD and LFD mucosa  
10 underwent normal gestational age-related increases in numbers, uNK numbers were not affected by diet  
11 (Figure 2A).

12 Following these histological assessments, proportions of total leukocytes (CD45<sup>+</sup>) and uNK  
13 (CD3<sup>-</sup>CD122<sup>+</sup>) were examined by flow cytometry in Gd10.5 implantation sites, as were specific tr-  
14 uNK, c-uNK, and uNK precursor cell sub-populations (Figure 2B). HFD exposure showed a modest,  
15 but non-significant effect on total CD45<sup>+</sup> immune cell proportions, where an increasing trend in CD45<sup>+</sup>  
16 cell frequency was observed only within the DIO subgroup (Figure 2C). Similarly, total uNK  
17 frequencies were not impacted by HFD or diet-induced weight gain (Figure 2D). Consistent with this,  
18 HFD did not exert any measurable differences in proportions of tr-uNK, although an increase in tr-uNK  
19 frequency was observed within DIO compared to DIO-R mice; a similar though non-significant  
20 relationship ( $P = 0.1$ ) between tr-uNK proportions in DIO and LFD control mice was also observed  
21 (Figures 2E). Conventional-uNK made up a smaller proportion (~10-20%) of uNK compared to the  
22 dominant tr-uNK population, where frequencies were also not altered by diet or diet-induced weight  
23 gain (Figure 2F). Lastly, the effect of HFD on uNK precursors (CD122<sup>+</sup>/NK1.1<sup>-</sup>/DX5<sup>-</sup>)<sup>34</sup> was

Baltayeva *et al*

1 measured, and consistent with the above findings, HFD exposure did not affect precursor frequencies  
2 (Figure 2G).

### 3 **Proportions of NCR1<sup>+</sup> uNK increase in response to high-fat diet**

4 Natural cytotoxicity receptor 1 (NCR1) is essential for uNK maturation and function, and plays  
5 critical roles in promoting uterine blood vessel remodeling in mice<sup>35,36</sup>. Thus, to further elucidate the  
6 effects of maternal HFD on uNK biology, NCR1 uNK proportions and expression levels were  
7 examined by flow cytometry. While HFD did not impact cell surface levels of NCR1 expression (MFI),  
8 mice exposed to HFD did show increased frequencies of NCR1<sup>+</sup> uNK (Figures 3A, B, C). Further  
9 analysis revealed that the increase in NCR1<sup>+</sup> uNK in HFD mice is primarily driven by the DIO-R sub-  
10 group; DIO mice showed a modest but non-significant increase in NCR1<sup>+</sup> uNK proportions ( $P = 0.09$ )  
11 (Figure 3B). These findings suggest that obesogenic diet exposure, and to a lesser extent diet-associated  
12 weight gain, manifest in subtle changes in uNK composition defined by NCR1 expression. Given the  
13 importance of NCR1 in vascular processes in pregnancy, diet-induced differences in NCR1 may  
14 translate to alterations in uterine artery remodeling or cytotoxicity.

15

### 16 **HFD exposure drives uNK activity**

17 Since NCR1 associates with the promotion of uNK maturation and activation, we next set out to  
18 examine if HFD exposure alters uNK activity<sup>36</sup>. To do this, two approaches were used:  
19 Immunofluorescence microscopy facilitated measurement of uNK cell diameter/size as a readout of  
20 maturity<sup>36</sup>, and flow cytometry analysis measured cell surface expression of the early activation marker  
21 CD69<sup>37</sup>. Because NCR1 is expressed predominantly by DBA<sup>+</sup> cells at Gd10.5<sup>36</sup>, focus was given to  
22 measuring DBA<sup>+</sup> cell diameters within histological sections of utero-placental tissues. While cell

Baltayeva *et al*

1 diameters of DBA<sup>+</sup> uNK were not shown to be different between HFD and control LFD mice  
2 (Supplemental Figure 1C), CD69 expression levels (MFI) were significantly higher in both total (CD3<sup>-</sup>  
3 CD122<sup>+</sup>) and NCR1<sup>+</sup> uNK populations as a result of HFD exposure (Figures 4A, B, C). In line with our  
4 findings that NCR1 proportions are higher within the DIO-R sub-group than in control LFD or DIO  
5 mice, the increase in HFD-induced CD69 expression was primarily attributed to uNK within the DIO-  
6 R, and not the DIO subgroup, the latter of which showed greater heterogeneity in CD69 expression  
7 (Figures 4B, C). Overall these findings suggest that HFD exposure, independent of weight gain,  
8 instructs an altered state of uNK activity.

9

## 10 **HFD impairs uterine spiral artery remodeling in mid but not late pregnancy**

11 HFD-induced differences in uNK NCR1<sup>+</sup> frequency and activity suggest that pregnancy  
12 associated processes controlled by uNK, like placental development<sup>31</sup> and uterine artery remodeling<sup>38</sup>,  
13 may be affected by HFD. To assess this, we first examined if specific placental layers/zones at Gd14.5  
14 are altered by HFD; Gd14.5 represents a developmental time-point when the mouse placenta is mature  
15 and fully functional. Total placental area (mm<sup>2</sup>), consisting of labyrinth zone (L), junctional zone (Jz),  
16 and decidua (D)<sup>39</sup> were not different between control LFD and HFD mice (Figure 5A). Subgrouping of  
17 HFD placentas into DIO and DIO-R categories showed that diet-induced weight gain also did not affect  
18 overall placental area (Figure 5A). Moreover, HFD exposure did not result in changes in area within  
19 individual placental layers (i.e. L, JZ, and D) (Figure 5B, C, D). However, discrepancies in labyrinth  
20 area were identified between placentas of DIO and DIO-R mice, where the labyrinth area in DIO-R  
21 mice was greater (Figure 5B). Together our findings indicate that HFD-related uNK changes in early-  
22 mid gestation do not translate into major changes in placental morphology.



Baltayeva *et al*

1 To examine whether HFD-induced uNK changes translate into alterations in uterine artery  
2 remodeling, measurements of Gd10.5 uterine arterial wall and vessel lumen areas, as well as their  
3 ratios, were next determined (Figure 6A). We also assessed decidual artery smooth muscle actin (SMA)  
4 expression, localization, and vessel intactness via immunofluorescence microscopy at Gd7.5, just prior  
5 to initiation of vascular remodeling, and at Gd10.5, when remodeling is at its peak and can be assessed  
6 by smooth muscle integrity by staining for SMA<sup>40,41</sup>. At Gd10.5, HFD-exposed mice had smaller  
7 vessels and thicker arterial walls (Figure 6A), and accordingly had significantly higher wall:lumen area  
8 ratios (Figure 6B). Interestingly, both DIO and DIO-R mice showed this arterial remodeling phenotype  
9 (Figure 6B). Examining SMA intactness at Gd7.5 by immunofluorescence microscopy, control LFD  
10 mice showed a marginal but significant increase in artery SMA coverage over HFD mice (Figure 6C,  
11 D). However, by Gd10.5, SMA staining within control mice was more sparse (i.e. smaller  
12 SMA:Perimeter ratio) than in HFD mice; HFD arteries showed only a partial loss in SMA staining, and  
13 this was reflected with higher SMA:Perimeter ratios (Figure 6D). By Gd14.5, differences in blood  
14 vessel remodeling observed within HFD mice were no longer observed (Figure 6E). Specifically,  
15 uterine arteries in both LFD and HFD mice showed dilated lumens and thin vessel walls indicative of  
16 proper remodeling (Figure 6E). Together, these findings suggest that maternal obesity disrupts uNK-  
17 mediated vascular remodeling in early-mid gestation, but that compensatory processes facilitating  
18 proper artery remodeling by mid-late gestation may overcome these initial impairments.

19

## 20 **HFD exposure leads to subtle changes in uNK gene expression**

21 To gain insight into possible uNK-related mechanisms altered by HFD exposure, global gene  
22 expression analyses were performed on mRNAs isolated from flow cytometry-sorted  
23 CD45<sup>+</sup>/CD122<sup>+</sup>/CD3<sup>-</sup> uNK using gene microarrays (Figure 7A). Following standard probe filtering,

Baltayeva *et al*

1 normalization, and batch correction (Supplemental Figure 2A), differential gene expression comparison  
2 (FDR < 0.05), principal component (PCA), and hierarchical cluster analyses were performed between  
3 control LFD, DIO, and DIO-R uNK subgroups. Surprisingly, differential gene expression analysis did  
4 not identify any differentially expressed genes between the uNK subgroups (Supplemental Figure 2B),  
5 likely owing to the underpowered and heterogeneous composition of HFD uNK. PCA clustering based  
6 on global gene signatures further demonstrated that mouse uNKs exposed to HFD do not harbor unique  
7 or drastic differences in gene transcription, where uNK sub-group clustering showed DIO and DIO-R  
8 uNK to cluster randomly (Supplemental Figure 2C).

9         Despite the inability of a global gene signature approach to identify HFD-specific genes altered  
10 in uNK, hierarchical clustering of LFD, DIO, and DIO-R uNK using a 578 gene signature derived from  
11 raw *P*-value ranked genes ( $P < 0.05$ , fold-change > 1.25) segregated uNK into diet-associated sub-  
12 groups with 85-90% accuracy (Figure 7B). This finding suggests that HFD and associated weight gain  
13 may subtly affect the expression of specific uNK genes that were previously not identifiable due to the  
14 statistical stringency applied to the global high dimensional dataset. Of the selected 578 rank-ordered  
15 genes, one-way ANOVA with post-hoc Tukey HSD identified 71 genes to be differentially expressed  
16 within LFD, DIO, and DIO-R subgroups (Supplemental Table 1). Specifically, sets of genes linked  
17 with uNK cytotoxicity and activation were expressed at higher levels within both DIO (*Cd200r4*,  
18 *Il18rap*) and DIO-R (*Cd226*) subgroups (Figure 7C). In line with our findings that uterine vascular  
19 remodeling was affected by high-fat diet, expression of pro-angiogenic/pro-remodeling *Vegfa*,  
20 *Adamts3*, *Nr4a1* and *Pde5a* were shown to be altered in DIO and DIO-R subgroups compared to LFD  
21 controls, with *Vegfa*-regulating *Anxa8* being inversely expressed within HFD samples compared to  
22 controls (Figure 7D). Targeted qPCR analysis of *Vegfa* in a subset of the same uNK mRNA samples  
23 used in the gene array supported the array's finding (Supplemental Figure 2D). Moreover, HFD also

Baltayeva *et al*

1 resulted in alterations in levels of genes important in metabolism, where *H6pd* and *Hk2*, genes central  
2 to glucose metabolism, and *Renbp*, regulator of amino-sugar metabolism, were up-regulated in DIO  
3 and DIO-R subgroups (Figure 7E). Levels of *Scd1*, a gene important in lipid metabolism, were higher  
4 in the LFD control group (Figure 7E). Taken together, while chronic HFD exposure does not lead to  
5 robust global changes in uNK gene signatures, HFD does modestly affect the expression of select genes  
6 important in regulating uNK-mediated cytotoxicity/activation, vascular biology, and metabolism. These  
7 weight-gain dependent and independent differences provide insight into the biological underpinnings of  
8 how maternal obesity affects uNK processes important in pregnancy.

9

Baltayeva *et al*

## 1 **DISCUSSION**

2           In this study, we examine the effects of maternal HFD on uNK cell biology and uterine vascular  
3 transformations in early and mid-pregnancy. We demonstrate that HFD does not alter total uNK  
4 numbers or subsets of tissue-resident or conventional cells. However, weight gain-specific effects on tr-  
5 uNK were observed, and additionally exposure to HFD results in a selective increase in NCR1<sup>+</sup> uNK  
6 frequencies and overall uNK activity. These diet-related uNK changes associate with impairments in  
7 uterine artery remodeling in early-mid pregnancy, but were no longer observed by mid-late pregnancy,  
8 suggesting that a compensatory mechanism in uNK function may be taking place. While examination  
9 of global gene expression signatures did not identify specific uNK genes or pathways altered by HFD,  
10 gene signature-informed hierarchical clustering did segregate uNK according to diet exposure with  
11 relative high accuracy, indicating that uNK genes and gene pathways are moderately affected in  
12 obesogenic mice. Genes identified as being differentially expressed between control and HFD sub-  
13 groups signified that uNK exposed to HFD harbor pro-cytotoxic and anti-angiogenic characteristics  
14 that together provide new insight into how maternal obesity may alter uNK processes critical to early  
15 pregnancy establishment and health.

16           To our knowledge, this is the first study to examine the effects of HFD on uNK cell proportions  
17 and states of activation in pregnancy. Importantly, this work also examines the specific effects of HFD-  
18 exposure and HFD-associated weight gain. While a previous study did report on the effects of maternal  
19 Western diet exposure on NK properties within draining inguinal lymph nodes of the uterus<sup>10</sup>, our  
20 study directly examines uNK tissue-resident and conventional subsets within the decidual mucosa.  
21 Because uNK are distinct from peripheral blood and lymphatic NKs<sup>34,42,43</sup>, our findings generate new  
22 insight into how maternal obesity potentially impacts immune cell function within the maternal-fetal  
23 interface. While HFD exposure does not affect the frequency of total leukocytes or uNK subtypes

Baltayeva *et al*

1 within the uterus, notably we show that HFD exposure increases both the proportion of NCR1<sup>+</sup> uNK  
2 and uNK activation. Strikingly, differences in NCR1 frequency and uNK activation were primarily  
3 observed in HFD mice that were resistant to diet-induced weight gain (i.e. DIO-R), suggesting that the  
4 HFD-related features altered in uNK and uterine arteries may not necessarily be related to changes in  
5 overall adiposity. Our finding that weight-gain related effects on elevated blood serum TNF $\alpha$  and  
6 increased rates of fetal resorption may therefore be unrelated to changes in uNK biology. However, due  
7 to inter- sub-group heterogeneity and overall modest sample size, further work is needed to investigate  
8 the direct role of excessive adipose tissue (i.e. obesity) and diet-related factors like fatty acids and  
9 metabolites that may also lead to uterine immune cell dysfunctions.

10 The impact of obesogenic-diets on fetal health and pregnancy outcome in rodents has not been  
11 consistently reported on. Prior studies have reported that HFD exposure in pregnancy results in both  
12 reduced<sup>44,45</sup> and increased<sup>46,47</sup> fetal weight, and reduced placental labyrinth<sup>48</sup> and junctional zone<sup>44</sup>  
13 thickness, or no differences in placental weights<sup>45,49,50</sup>. In our study, placental and fetal weights and  
14 placental/decidual areas were not affected by HFD. Notably, HFD exposure did result in increased rates  
15 in fetal resorption, although this effect was modest. Important and somewhat counter to our findings  
16 showing that DIO-R uNK have elevated activity and expression of NCR1, the increase in fetal  
17 resorption is primarily attributed to DIO mice, and not weight gain-resistant DIO-R mice. The  
18 underlying cause for this observation is unknown but does nonetheless highlight the importance of  
19 needing to subcategorize mice subjected to experimental diet models of obesity as true weight gainers  
20 or as weight gain-resistant mice. In our hands, DIO and DIO-R murine uNK showed modest, but  
21 significant differences in specific parameters, and these differences were in part associated by weight  
22 gain-specific differences in gene expression.

Baltayeva *et al*

1           Our focus on NCR1 stems from previous work reporting that *Ncr1*<sup>-/-</sup> mice exhibit defects in  
2 decidual angiogenesis and uterine vascular remodeling<sup>36</sup>. Notably, inhibition of NCR1 delays uNK cell  
3 maturation and activation, reflected by smaller cell diameters and reductions in cytokine production<sup>51</sup>.  
4 Our finding that HFD led to inverse associations between frequencies of NCR1<sup>+</sup> uNK and degree of  
5 vascular remodeling (i.e. elevated NCR1 frequencies and impaired arterial remodeling) is inconsistent  
6 with what is known about the role of NCR1 in uNK biology. At least two possible explanations can  
7 account for this discrepancy. Firstly, the increase in NCR1<sup>+</sup> uNK may reflect a level of compensation,  
8 and this is supported by the fact that initial impairments in vascular structure are no longer observed by  
9 Gd14.5.

10           A second possibility centers on the role of NCR1 as a key activating receptor important in  
11 promoting cytotoxic functions of NK<sup>52-54</sup>. Perhaps, elevated NCR1 frequency indicates that uNK  
12 exposed to HFD are either overly activated or are aberrantly cytotoxic. In line with this speculation, we  
13 show that mRNA levels of the pro-cytotoxic receptor *Cd226* (encoding for DNAM-1) are elevated  
14 within HFD uNK. DNAM-1 associates with NK maturation and memory and CD226<sup>+</sup> NK are more  
15 cytotoxic and produce higher levels of inflammatory cytokines than do CD226<sup>-</sup> counterparts<sup>55,56</sup>.  
16 Intriguingly, *Cd226* levels are more abundant within DIO-R, while transcripts encoding for CD200R4,  
17 a DAP12-associated activating receptor<sup>57</sup>, are expressed at higher levels in DIO uNK, suggesting that  
18 distinct mechanisms of activation are induced in relation to diet and/or adiposity/weight gain. Overall,  
19 these possibilities are consistent with a recent finding in human uNK that correlates maternal obesity to  
20 elevated rates of uNK degranulation<sup>27</sup>. However, it remains to be tested if obesity-linked hyper-  
21 activation in uNK equates to increased killing and dysfunction of cells within the maternal-fetal  
22 interface. Further, if indeed the case, cell-type specific uNK targets need also to be identified, as this

Baltayeva *et al*

1 will help in our understanding of the biological consequences of heightened uNK activity in response  
2 to maternal obesity and/or HFD.

3 Of interest, and consistent with previous findings in uNK from obese women<sup>27</sup>, HFD exposure  
4 in mice results in a decrease in *Vegfa* expression. While multiple cell types within the utero-placental  
5 environment are responsible for VEGF-A production, including decidual stromal cells<sup>58,59</sup> and  
6 macrophages<sup>60</sup>, the transient nature of uNK in pregnancy and their links to vascular growth, branching,  
7 and remodeling suggest that uNK deficiency in VEGF-A production could directly translate into  
8 impairments in uterine vascular biology. VEGF-A is also a ligand for Flt-1 expressing trophoblasts,  
9 where VEGF-A plays roles in controlling trophoblast survival and proliferation<sup>61-63</sup>, however our  
10 finding that HFD exposure does not impact the development of specific zones of the placenta indicates  
11 that VEGF-A dysregulation may play a more significant and specific role in uterine artery  
12 angiogenesis.

13 It is becoming widely appreciated that cellular metabolism plays a role in regulating NK cell  
14 function and education<sup>64</sup>. A recent study demonstrated that glucose metabolism is required for receptor-  
15 activated NK cell IFN $\gamma$  production<sup>65</sup>. Accordingly, Michelet *et al*<sup>66</sup> showed that obesity-driven  
16 metabolic paralysis results blunted NK cell cytotoxic responses. In line with these findings we  
17 demonstrate an increase in expression of *H6pd* and *Hk2* and decreased levels of *Scd1* in DIO and DIO-  
18 R uNKs, where *H6pd* and *Hk2* are important regulators of glycolysis and *Scd1* is involved in fatty acid  
19 metabolism. Overall, it is likely that the obesogenic environment in HFD mice may induce a metabolic  
20 switch in uNKs that impacts maturation and function that may ultimately alter maternal-fetal interface  
21 remodeling and overall uNK education. Potential metabolic effects on uNK processes will be of high  
22 interest to further examine as metabolic dysfunction and altered programming of uNK in human  
23 pregnancies could in part contribute to impaired pregnancy outcomes.

Baltayeva *et al*

1           uNKs are specialized immune cells that play an important role in coordinating reproductive  
2 success. Deviations in normal uNK function may contribute to defective vascular modifications or  
3 aberrant induction of cytotoxic potential at the maternal-fetal interface. Such uNK-related changes may  
4 play roles in pregnancy complications. Our study provides insight into how exposure to an obesogenic  
5 diet alters uNK activity and alters spiral artery remodeling, highlighting possible cellular mechanisms  
6 underlying HFD exposure. Maternal obesity continues to pose serious consequences on reproductive  
7 health, thus future studies aimed to further dissect how obesity-driven immune and cellular alterations  
8 impact pregnancy health will be of substantial importance.

9

10



Baltayeva *et al*

## 1 **METHODS**

2 **Animals.** Mouse experiments were carried out in accordance with the guidelines of the  
3 Canadian Council on Animal Care and approved by SFU University Animal Care Committee (protocol  
4 1094) and the UBC Animal Care Committee (protocol A17-0060). C57BL/6J mice were purchased  
5 from the Jackson Laboratory (Bar Harbor, ME, USA). Animals were housed under standard conditions  
6 in groups of max. 5 mice in individually ventilated cages with water and food available *ad libitum*,  
7 under a 12:12h light/dark cycle.

8  
9 **High-fat/high sugar obesogenic model.** At 9 weeks of age, females were placed on either a  
10 high-fat, high-sucrose diet (HFHS; 45% kcal fat, 35% carbohydrate (including 17% kcal sucrose), 20%  
11 kcal protein, 4.73 kcal/g, D12451, Research Diets, New Brunswick, NJ) or a nutrient-matched low-fat,  
12 no-sucrose control diet (CON; 10% kcal fat, 70% kcal carbohydrate (corn starch and maltodextrin),  
13 20% kcal protein, 3.85 kcal/g, D12450K, Research Diets). Females were kept on the experimental diets  
14 for 13 weeks prior to being paired with male studs. The appearance of a plug the next morning was  
15 taken as day 0.5 of pregnancy. Because not all females became pregnant when first paired, some had  
16 been on the experimental diet for 13–19 weeks at the start of pregnancy. On days 7.5, 10.5 and 14.5 of  
17 pregnancy females were euthanized and their blood collected via cardiac puncture. The utero-placental  
18 tissues with multiple implantation sites were collected from each mouse.

19  
20 **ELISA measurements of serum TNF $\alpha$ .** Serum was purified from whole blood of females  
21 sacrificed at Gd10.5 of pregnancy using serum separator tubes following standard procedures. Serum  
22 levels of TNF $\alpha$  were determined using commercially available Mouse TNF $\alpha$  ELISA kit (R&D  
23 systems) according to manufacturer's protocol.

Baltayeva *et al*

1

2           **Decidual leukocyte preparations.** For examination of uNK cell populations, murine  
3 implantation sites were separated from uterine tissues and were mechanically and enzymatically  
4 processed to obtain single-cell suspensions. In brief, tissues were washed extensively in cold  
5 phosphate-buffered saline (PBS; pH 7.4), and following this, tissues were minced with a razor blade  
6 and subjected to a 30-minute enzymatic digestion at 37 °C in 3 mL of 1:1 DMEM/F12 media (Gibco,  
7 Grand Island, NY; 200 mM L-glutamine) with 1X-collagenase/hyaluronidase (10X stock; StemCell  
8 Technologies, Vancouver, Canada), 80 µg/mL DNaseI (Sigma, St. Louis, MO),  
9 penicillin/streptomycin, and Anti antimycotic solution (100X dilution, Gibco). Single cell suspensions  
10 were passed through a 100µm strainer and decidual leukocyte enrichment was performed by Percoll  
11 (GE Healthcare) density gradient (layered 40%/80%) centrifugation. To avoid red blood cell  
12 contamination, cell mixture was briefly incubated with NH<sub>4</sub>Cl. Decidual leukocytes were immediately  
13 used for uNK isolation by fluorescence activated cell sorting (FACS) or cell-surface marker  
14 characterization via flow cytometry analyses.

15

16           **Flow cytometry.** Flow cytometry analyses were carried out following a standard protocol. In  
17 brief, 0.5x10<sup>6</sup> isolated leukocytes were incubated with Fc Block (anti-CD16/CD32 antibody at 1:35  
18 dilution in PBS; BD Pharmingen) for 10 min on ice to prevent non-specific binding. Cell suspensions  
19 were further incubated with fluorescent-conjugated antibodies directed against cell-surface markers for  
20 30 minutes at 4°C. The following antibodies were used: APC ef780 CD3e (1:50; clone 145-2C11;  
21 eBioscience), ef450 CD45 (1:100; clone 30-F11; eBioscience), PerCP710 CD122 (1:100; clone TM-  
22 b1; eBioscience), APC CD122 (1:35; clone TM-Beta 1; BD Pharmingen), APC CD49a (1:50; clone  
23 HMα1; BioLegend), PeCy7 CD49b (1:100; clone DX5; eBioscience), APC CD69 (1:25; clone H1.2F3;

Baltayeva *et al*

1 eBioscience), PeCy7 NKp46 (1:50; clone 29A1.4; eBioscience). Following staining, cells were re-  
2 suspended in 7-AAD viability staining solution (at 1:25 dilution in PBS+ 2%FBS +1%  
3 penicillin/streptomycin; eBioscience). Samples were acquired on an LSRII FACS (BD Biosciences)  
4 and data was analysed by FlowJo 5.0 software (Tree Star, Inc., Ashland, OR, USA).

5  
6 **Immunohistochemistry, IF microscopy and morphometry.** Implantation sites from Gd7.5,  
7 Gd10.5 and Gd14.5 were fixed in 4% paraformaldehyde for 24-48h followed by processing into  
8 paraffin blocks. Six- $\mu$ m sections were stained with hematoxylin and eosin (H&E) according to standard  
9 methods. For IF staining, tissues underwent antigen retrieval by heating slides in a microwave for 5  
10 minutes in 30-second intervals in a sodium citrate buffer (pH 6.0). Sections were then incubated in a  
11 blocking solution (5% bovine serum albumin (BSA) in Tris-buffered saline with 0.05% Tween-20  
12 (TBST)) for 1 hour at room temperature. Further, samples were incubated with the following  
13 antibodies overnight at 4°C: rabbit polyclonal alpha-smooth muscle actin (1:200; Abcam) and  
14 biotinylated DBA (1:100; Vector Laboratories). Slides were incubated with Alexa Fluor 568/488-  
15 conjugated streptavidin and goat anti-rabbit secondary antibodies (Life Technologies) for 1 hour at  
16 room temperature. Glass coverslips were mounted onto slides using ProLong Gold anti-fade reagent  
17 containing DAPI (Life Technologies).

18 *DBA<sup>+</sup> cell assessments.* DBA<sup>+</sup> cell quantities in Gd7.5 and Gd10.5 implantation sites were  
19 calculated based on DBA fluorescence intensity threshold. Slides were imaged using a 20x Plan-  
20 Aplanachromat/0.80 NA or a 40x EC-Plan-Neofluar/0.9 PoI objective (Carl Zeiss). Data was processed  
21 and analyzed using ZenPro software (Carl Zeiss). DBA<sup>+</sup> cell diameters in Gd10.5 implantation sites  
22 were measured by randomly selecting 100 DBA<sup>+</sup> uNK cells from each implantation site. Slides were  
23 imaged using a 40x EC-Plan-Neofluar/0.9 PoI objective (Carl Zeiss). Using ImageJ v1.50 software

Baltayeva *et al*

1 (NIH), the diameters of these cells were measured across their longest and shortest axes; an average  
2 of both values was used for statistical analysis. All images were obtained using Axiocam 506  
3 monochrome digital camera (Carl Zeiss).

4 *Spiral artery remodeling and SMA layer assessments.* Spiral artery remodeling measurements  
5 were performed on H&E stained slides. For Gd10.5, (HFD: n=9 implantation sites from 8 independent  
6 pregnancies; LFD: n=11 implantation sites from 9 independent pregnancies) all of the spiral arteries  
7 within the decidua were measured in triplicate (three sections 48 $\mu$ m apart from each other). For  
8 Gd14.5, (HFD: n=18 implantation sites from 7 independent pregnancies; LFD: n=17 implantation sites  
9 from 6 independent pregnancies) all of the spiral arteries within the decidua were measured in duplicate  
10 (two sections 48 $\mu$ m apart from each other). Size of arterial walls and lumens was determined by  
11 measuring cross-sectional areas with ImageJ v1.50 software (NIH). Wall:lumen ratios were calculated  
12 by dividing the arterial wall area ( $\mu$ m<sup>2</sup>) into the artery lumen area ( $\mu$ m<sup>2</sup>). Slides were imaged using a  
13 20x Plan-Apochromat/0.80 NA objective (Carl Zeiss). All images were obtained using Axiocam 105  
14 color digital camera (Carl Zeiss). SMA layer intactness was measured in spiral arteries of Gd7.5  
15 (HFD: n=15 arteries from 4 independent pregnancies; LFD: n=13 arteries from 4 independent  
16 pregnancies) and Gd10.5 (HFD: n=19 arteries from 8 independent pregnancies; LFD: n=12 arteries  
17 from 7 independent pregnancies). Slides were imaged using a 40x EC-Plan-Neofluar/0.9 PoI  
18 objective (Carl Zeiss). Arterial length and SMA layer were measured using ImageJ v1.50 software  
19 (NIH). SMA:Perimeter ratios were calculated by dividing SMA<sup>+</sup> vascular perimeter ( $\mu$ m) over total  
20 arterial perimeter ( $\mu$ m). All images were obtained using Axiocam 506 monochrome digital camera  
21 (Carl Zeiss).

22 *Placental morphology assessments.* H&E stained slides of Gd14.5 implantation sites were  
23 used for placental morphology measurements. Total area (mm<sup>2</sup>) and areas of each individual

Baltayeva *et al*

1 placental layer (mm<sup>2</sup>) were measured using ImageJ v1.50 software (NIH). To normalize for  
2 differences in total placental area among the measurements, individual layer area was expressed as a  
3 percentage of total area at each measurement point. Slides were imaged using 10x N-  
4 Achroplan/0.25 Ph1 objective (Carl Zeiss). All images were obtained using Axiocam 105 color  
5 digital camera (Carl Zeiss).

6  
7 **RNA extraction.** Prior to RNA extraction, CD45+CD3-CD122+ uNK cells from Gd10.5  
8 implantation sites were isolated by FACS using a FACSAria flow cytometry (BD Biosciences).  
9 Total RNA was prepared from isolated uNKs using TRIzol LS reagent (Ambion) following by  
10 RNeasy MinElute Cleanup (Qiagen) and DNase treatment (Ambion) according to manufacturers'  
11 protocols. RNA purity was confirmed using a NanoDrop Spectrophotometer (Thermo Fisher  
12 Scientific) and Agilent 2100 Bioanalyzer (Agilent). Only RNA samples having an RNA integrity  
13 number (RIN) greater than 8.0 were used.

14  
15 **Microarray analysis.** Total RNA samples extracted from mouse uNKs were sent to Génome  
16 Québec Innovation Centre (McGill University, Montréal, Canada) for RNA quantification. Briefly,  
17 mouse RNA samples were prepared for transcriptome profiling using the GeneChip™ Pico Reagent  
18 Kit (Affymetrix) as per manufacturer's protocol. Samples were run on the Clariom™ S Mouse Array to  
19 measure gene expression at >20000 genes in the mouse genome. Raw data generated from the arrays  
20 were read into R statistical software (version 3.5.1) with the Bioconductor *oligo*<sup>67</sup> package to convert  
21 raw Affymetrix CEL files into an expression matrix of intensity values. Within oligo package samples  
22 were background corrected, normalized, and log-transformed. Probe filtering identified 718 probes that  
23 mapped to multiple gene symbols were excluded from the dataset. Additionally, 6923 Affymetrix

Baltayeva *et al*

1 control probes and 749 probes that were not annotated to any given gene were also removed. A “soft”  
2 intensity-based probe filtering<sup>68</sup>, as recommended by *limma*, was performed to eliminate 2181 low  
3 variance and low intensity probes. Together, these measures eliminated 10571 probes, leaving a total of  
4 18558 probes remaining for further analysis. Using ComBat from *sva* package, known technical  
5 variation associated with batch was removed. Following preprocessing, differential expression analysis  
6 between groups was performed by applying a linear model to expression values using the *limma*  
7 package’s moderated t-statistics with empirical Bayesian variance estimation<sup>69</sup>.

8  
9 **cDNA synthesis, and qPCR.** RNA was reverse-transcribed using a first-strand cDNA  
10 synthesis kit (Quanta Biosciences) and subjected to qPCR ( $\Delta\Delta\text{CT}$ ) analysis, using PerfeCTa SYBR  
11 Green FastMix Low ROX (Quanta Biosciences) on an ABI ViiA 7 Real-Time PCR system (Thermo  
12 Fisher Scientific). Forward and reverse primer sets used as previously described: *VEGFA* (F: 5’-  
13 GTGCACTGGACCCTGGCTTTA-3’, R: 5’-GGTCTCAATCGGACGGCAGTA-3’)<sup>70</sup>; *HPRT* (F: 5’-  
14 CTGGTGAAAAGGACCTCTCG-3’, R: 5’-TGAAGTACTCATTATAGTCAAGGGCA-3’)<sup>71</sup>. All raw  
15 data were analyzed using QuantStudio V1.3 software (Thermo Fisher Scientific). The threshold cycle  
16 (CT) values were used to calculate relative gene expression levels. Values were normalized to *HPRT*  
17 transcripts.

18  
19 **Statistical analysis.** Unless stated otherwise, statistical significance for all data was assessed by  
20 unpaired two-tailed Student’s t-tests.  $P < 0.05$  was considered significant. Statistical analyses were  
21 performed using Prism7 software (GraphPad Software, Inc.).

22

Baltayeva *et al*

1 **ACKNOWLEDGEMENTS**

2 We are grateful to staff from Simon Fraser University Animal Care facility for their assistance.  
3 We would like to extend our gratitude to BCCHRI Flow Core Facility Manager, Dr. Lisa Xu, for her  
4 expertise and assistance in cell sorting of uNK cells. We are grateful to staff at Génome Québec  
5 Innovation Centre at McGill University for their help with microarray hybridization.

6

7 **CONFLICT OF INTEREST**

8 The authors declare no conflict of interest.

9

10 **AUTHOR CONTRIBUTIONS**

11 AGB and JKC designed the research. JB, CK, BC, DM, JKC and AGB performed the  
12 experiments. JB, CK, WPR, AGB and JKC analysed the data and wrote the paper. All authors read and  
13 approved the manuscript.

14

15

16

Baltayeva *et al*

1 **REFERENCES**

- 2 1. World Health Organisation. WHO | Obesity and overweight. *WHO* (2017).
- 3 2. Statistics Canada. Canadian Community Health Survey: Obesity among children and adults.  
4 Available at: <http://www.statcan.gc.ca/daily-quotidien/050706/dq050706a-eng.htm>.  
5 (Accessed: 26th February 2018)
- 6 3. Ogden, C. L., Carroll, M. D., Kit, B. K. & Flegal, M. Prevalence of Childhood and Adult Obesity  
7 in the United States, 2011–2012. *Jama* **311**, 806–814 (2016).
- 8 4. Public Health Agency of Canada. Obesity in Canada: A joint report from the Public Health  
9 Agency of Canada and the Canadian Institute for Health Information. *Report No. Cat.: HP5-*  
10 *107/2011E-PDF*. (2011). Available at: [https://www.canada.ca/en/public-](https://www.canada.ca/en/public-health/services/health-promotion/healthy-living/obesity-canada.html)  
11 [health/services/health-promotion/healthy-living/obesity-canada.html](https://www.canada.ca/en/public-health/services/health-promotion/healthy-living/obesity-canada.html). (Accessed: 26th  
12 February 2018)
- 13 5. Leddy, M. A., Power, M. L. & Schulkin, J. The impact of maternal obesity on maternal and  
14 fetal health. *Rev. Obstet. Gynecol.* **1**, 170–8 (2008).
- 15 6. Bautista-Castaño, I. *et al*. Maternal obesity in early pregnancy and risk of adverse  
16 outcomes. *PLoS One* (2013). doi:10.1371/journal.pone.0080410
- 17 7. Denison, F. C., Roberts, K. A., Barr, S. M. & Norman, J. E. Obesity, pregnancy, inflammation,  
18 and vascular function. *Reproduction* **140**, 373–385 (2010).
- 19 8. Schmatz, M., Madan, J., Marino, T. & Davis, J. Maternal obesity: The interplay between  
20 inflammation, mother and fetus. *Journal of Perinatology* **30**, 441–446 (2010).
- 21 9. Hayes, E. K. *et al*. Trophoblast invasion and blood vessel remodeling are altered in a rat  
22 model of lifelong maternal obesity. *Reprod. Sci.* **21**, 648–57 (2014).
- 23 10. Parker, V. J., Solano, M. E., Arck, P. C. & Douglas, A. J. Diet-induced obesity may affect the



Baltayeva *et al*

- 1 uterine immune environment in early–mid pregnancy, reducing NK-cell activity and  
2 potentially compromising uterine vascularization. *Int. J. Obes.* **38**, 766–774 (2014).
- 3 11. Hayes, E. K. *et al.* Adverse fetal and neonatal outcomes associated with a life-long high fat  
4 diet: Role of altered development of the placental vasculature. *PLoS One* **7**, (2012).
- 5 12. Osol, G. & Moore, L. G. Maternal Uterine Vascular Remodeling During Pregnancy.  
6 *Microcirculation* **21**, 38–47 (2014).
- 7 13. Bardin, N., Murthi, P. & Alfaidy, N. Normal and Pathological Placental Angiogenesis. *BioMed*  
8 *Research International* **2015**, (2015).
- 9 14. Cartwright, J. E., Fraser, R., Leslie, K., Wallace, A. E. & James, J. L. Remodelling at the  
10 maternal-fetal interface: Relevance to human pregnancy disorders. *Reproduction* **140**,  
11 803–813 (2010).
- 12 15. Faas, M. M. & de Vos, P. Uterine NK cells and macrophages in pregnancy. *Placenta* **56**, 44–  
13 52 (2017).
- 14 16. Moffett-King, A. Natural killer cells and pregnancy. *Nat. Rev. Immunol.* **2**, 656–663 (2002).
- 15 17. Felker, A. M. & Croy, B. A. Uterine natural killer cell partnerships in early mouse decidua  
16 basalis. *J. Leukoc. Biol.* **100**, 645–655 (2016).
- 17 18. Croy, B. A. *et al.* Imaging of vascular development in early mouse decidua and its  
18 association with leukocytes and trophoblasts. *Biol. Reprod.* **87**, 125 (2012).
- 19 19. Ashkar, A. A., Di Santo, J. P. & Croy, B. A. Interferon gamma contributes to initiation of  
20 uterine vascular modification, decidual integrity, and uterine natural killer cell maturation  
21 during normal murine pregnancy. *J. Exp. Med.* **192**, 259–70 (2000).
- 22 20. Barber, E. M. & Pollard, J. W. The uterine NK cell population requires IL-15 but these cells  
23 are not required for pregnancy nor the resolution of a *Listeria monocytogenes* infection. *J.*

Baltayeva *et al*

- 1            *Immunol.* **171**, 37–46 (2003).
- 2    21.    Guimond, M.-J. *et al.* Absence of Natural Killer Cells during Murine Pregnancy Is Associated  
3            with Reproductive Compromise in TgE26 Mice. *Biol. Reprod.* **56**, 169–179 (1997).
- 4    22.    Xu, H. Obesity and metabolic inflammation. *Drug Discovery Today: Disease Mechanisms* **10**,  
5            (2013).
- 6    23.    Stolarczyk, E. Adipose tissue inflammation in obesity: a metabolic or immune response?  
7            *Current Opinion in Pharmacology* **37**, 35–40 (2017).
- 8    24.    Patel, P. S., Buras, E. D. & Balasubramanyam, A. The role of the immune system in obesity  
9            and insulin resistance. *Journal of Obesity* **2013**, (2013).
- 10   25.    Seijkens, T., Kusters, P., Chatzigeorgiou, A., Chavakis, T. & Lutgens, E. Immune cell crosstalk  
11            in obesity: A key role for costimulation? *Diabetes* **63**, 3982–3991 (2014).
- 12   26.    Perdu, S. *et al.* Maternal obesity drives functional alterations in uterine NK cells. *JCI Insight*  
13            **1**, (2016).
- 14   27.    Castellana, B. *et al.* Maternal obesity alters uterine NK activity through a functional  
15            KIR2DL1/S1 imbalance. *Immunol. Cell Biol.* 805–819 (2018). doi:10.1111/imcb.12041
- 16   28.    Enriori, P. J. *et al.* Diet-Induced Obesity Causes Severe but Reversible Leptin Resistance in  
17            Arcuate Melanocortin Neurons. *Cell Metab.* (2007). doi:10.1016/j.cmet.2007.02.004
- 18   29.    Heerwagen, M. J. R., Stewart, M. S., de la Houssaye, B. A., Janssen, R. C. & Friedman, J. E.  
19            Transgenic Increase in N-3/N-6 Fatty Acid Ratio Reduces Maternal Obesity-Associated  
20            Inflammation and Limits Adverse Developmental Programming in Mice. *PLoS One* (2013).  
21            doi:10.1371/journal.pone.0067791
- 22   30.    Murabayashi, N. *et al.* Maternal high-fat diets cause insulin resistance through  
23            inflammatory changes in fetal adipose tissue. *Eur. J. Obstet. Gynecol. Reprod. Biol.* (2013).

Baltayeva *et al*

- 1           doi:10.1016/j.ejogrb.2013.02.003
- 2   31.   Gaynor, L. M. & Colucci, F. Uterine natural killer cells: Functional distinctions and influence  
3           on pregnancy in humans and mice. *Frontiers in Immunology* **8**, (2017).
- 4   32.   Sojka, D. K. *et al.* Tissue-resident natural killer (NK) cells are cell lineages distinct from  
5           thymic and conventional splenic NK cells. *Elife* (2014). doi:10.7554/eLife.01659
- 6   33.   Croy, B. A., Yamada, A. T., DeMayo, F. J. & Adamson, S. L. *The Guide to investigation of mouse*  
7           *pregnancy. The Guide to Investigation of Mouse Pregnancy* **1**, (2015).
- 8   34.   Yadi, H. *et al.* Unique Receptor Repertoire in Mouse Uterine NK cells. *J. Immunol.* **181**,  
9           6140–6147 (2008).
- 10 35.   Felker AM, C. B. Natural cytotoxicity receptor 1 in mouse uNK cell maturation and function.  
11           *Mucosal Immunol.* (2017). doi:10.1038/mi.2016.126
- 12 36.   Felker, A. M., Chen, Z., Foster, W. G. & Croy, B. A. Receptors for non-MHC ligands contribute  
13           to uterine natural killer cell activation during pregnancy in mice. *Placenta* **34**, 757–764  
14           (2013).
- 15 37.   Mosimann, B. *et al.* Natural killer cells and their activation status in normal pregnancy. *Int.*  
16           *J. Reprod. Med.* **2013**, 906813 (2013).
- 17 38.   Moffett, A. & Colucci, F. Uterine NK cells: Active regulators at the maternal-fetal interface.  
18           *Journal of Clinical Investigation* **124**, (2014).
- 19 39.   Coan, P. M., Ferguson-Smith, A. C. & Burton, G. J. Developmental Dynamics of the Definitive  
20           Mouse Placenta Assessed by Stereology1. *Biol. Reprod.* **70**, 1806–1813 (2004).
- 21 40.   Lima, P. D. A., Zhang, J., Dunk, C., Lye, S. J. & Anne Croy, B. Leukocyte driven-decidual  
22           angiogenesis in early pregnancy. *Cellular and Molecular Immunology* **11**, 522–537 (2014).
- 23 41.   Kieckbusch, J., Gaynor, L. M. & Colucci, F. Assessment of Maternal Vascular Remodeling

Baltayeva *et al*

- 1            During Pregnancy in the Mouse Uterus. *J. Vis. Exp.* (2015). doi:10.3791/53534
- 2    42.    Koopman, L. A. *et al.* Human Decidual Natural Killer Cells Are a Unique NK Cell Subset with
- 3            Immunomodulatory Potential. *J. Exp. Med.* **198**, 1201–1212 (2003).
- 4    43.    Erick, T. K. & Brossay, L. Phenotype and functions of conventional and non-conventional
- 5            NK cells. *Current Opinion in Immunology* **38**, 67–74 (2016).
- 6    44.    Mark, P. J. *et al.* A maternal high-fat diet in rat pregnancy reduces growth of the fetus and
- 7            the placental junctional zone, but not placental labyrinth zone growth. in *Journal of*
- 8            *Developmental Origins of Health and Disease* **2**, 63–70 (2011).
- 9    45.    King, V., Hibbert, N., Seckl, J. R., Norman, J. E. & Drake, A. J. The effects of an obesogenic diet
- 10           during pregnancy on fetal growth and placental gene expression are gestation dependent.
- 11           *Placenta* **34**, 1087–1090 (2013).
- 12    46.    Jones, H. N. *et al.* High-fat diet before and during pregnancy causes marked up-regulation of
- 13           placental nutrient transport and fetal overgrowth in C57/BL6 mice. *FASEB J.* **23**, 271–278
- 14           (2009).
- 15    47.    Rosario, F. J., Kanai, Y., Powell, T. L. & Jansson, T. Increased placental nutrient transport in a
- 16           novel mouse model of maternal obesity with fetal overgrowth. *Obesity* **23**, 1663–1670
- 17           (2015).
- 18    48.    Song, L. *et al.* Prenatal high-fat diet alters placental morphology, nutrient transporter
- 19           expression, and mtorc1 signaling in rat. *Obesity* **25**, 909–919 (2017).
- 20    49.    Crew, R. C., Waddell, B. J. & Mark, P. J. Maternal obesity induced by a ‘cafeteria’ diet in the
- 21           rat does not increase inflammation in maternal, placental or fetal tissues in late gestation.
- 22           *Placenta* **39**, 33–40 (2016).
- 23    50.    Kamimae-Lanning, A. N. *et al.* Maternal high-fat diet and obesity compromise fetal

Baltayeva *et al*

- 1 hematopoiesis. *Mol. Metab.* **4**, 25–38 (2015).
- 2 51. Felker, A. M. & Croy, B. A. Natural cytotoxicity receptor 1 in mouse uNK cell maturation and  
3 function. *Mucosal Immunol.* **10**, 1122–1132 (2017).
- 4 52. Glasner, A. *et al.* Recognition and Prevention of Tumor Metastasis by the NK Receptor  
5 Nkp46/NCR1. *J. Immunol.* (2012). doi:10.4049/jimmunol.1102461
- 6 53. Glasner, A. *et al.* Increased NK cell immunity in a transgenic mouse model of Nkp46  
7 overexpression. *Sci. Rep.* (2017). doi:10.1038/s41598-017-12998-w
- 8 54. Sheppard, S. *et al.* The Murine Natural Cytotoxic Receptor Nkp46/NCR1 Controls TRAIL  
9 Protein Expression in NK Cells and ILC1s. *Cell Rep.* **22**, 3385–3392 (2018).
- 10 55. Martinet, L. *et al.* DNAM-1 expression marks an alternative program of NK cell maturation.  
11 *Cell Rep.* (2015). doi:10.1016/j.celrep.2015.03.006
- 12 56. Wagner, A. K. *et al.* Expression of CD226 is associated to but not required for NK cell  
13 education. *Nat. Commun.* (2017). doi:10.1038/ncomms15627
- 14 57. Wright, G. J. *et al.* Characterization of the CD200 Receptor Family in Mice and Humans and  
15 Their Interactions with CD200. *J. Immunol.* (2003). doi:10.4049/jimmunol.171.6.3034
- 16 58. Kim, M. *et al.* VEGF-A regulated by progesterone governs uterine angiogenesis and vascular  
17 remodelling during pregnancy. *EMBO Mol. Med.* (2013). doi:10.1002/emmm.201302618
- 18 59. Sharma, S., Godbole, G. & Modi, D. Decidual Control of Trophoblast Invasion. *American*  
19 *Journal of Reproductive Immunology* (2016). doi:10.1111/aji.12466
- 20 60. Lash, G. E. *et al.* Decidual macrophages: key regulators of vascular remodeling in human  
21 pregnancy. *J. Leukoc. Biol.* (2016). doi:10.1189/jlb.1A0815-351R
- 22 61. Andraweera, P. H., Dekker, G. A. & Roberts, C. T. The vascular endothelial growth factor  
23 family in adverse pregnancy outcomes. *Human Reproduction Update* (2012).

Baltayeva *et al*

- 1           doi:10.1093/humupd/dms011
- 2   62.   Athanassiades, A., Hamilton, G. S. & Lala, P. K. Vascular endothelial growth factor stimulates  
3           proliferation but not migration or invasiveness in human extravillous trophoblast. *Biol*  
4           *Reprod* (1998). doi:10.1095/biolreprod59.3.643
- 5   63.   Zhou, Y. *et al*. Vascular endothelial growth factor ligands and receptors that regulate  
6           human cytotrophoblast survival are dysregulated in severe preeclampsia and hemolysis,  
7           elevated liver enzymes, and low platelets syndrome. *Am. J. Pathol.* (2002).  
8           doi:10.1016/S0002-9440(10)62567-9
- 9   64.   Kobayashi, T. & Mattarollo, S. R. Natural killer cell metabolism. *Molecular Immunology*  
10           (2017). doi:10.1016/j.molimm.2017.11.021
- 11   65.   Keppel, M. P., Saucier, N., Mah, A. Y., Vogel, T. P. & Cooper, M. A. Activation-Specific  
12           Metabolic Requirements for NK Cell IFN- $\gamma$  Production. *J. Immunol.* (2015).  
13           doi:10.4049/jimmunol.1402099
- 14   66.   Michelet, X. *et al*. Metabolic reprogramming of natural killer cells in obesity limits  
15           antitumor responses. *Nat. Immunol.* (2018). doi:10.1038/s41590-018-0251-7
- 16   67.   Carvalho, B. S. & Irizarry, R. A. A framework for oligonucleotide microarray preprocessing.  
17           *Bioinformatics* (2010). doi:10.1093/bioinformatics/btq431
- 18   68.   Klaus, B. An end to end workflow for differential gene expression using Affymetrix  
19           microarrays. *F1000Research* (2016). doi:10.12688/f1000research.8967.1
- 20   69.   Smyth, G. K. Linear Models and Empirical Bayes Methods for Assessing Differential  
21           Expression in Microarray Experiments. *Stat. Appl. Genet. Mol. Biol.* (2004).  
22           doi:10.2202/1544-6115.1027
- 23   70.   Futatsugi, K. *et al*. Obesity-induced kidney injury is attenuated by amelioration of aberrant

Baltayeva *et al*

- 1            PHD2 activation in proximal tubules. *Sci. Rep.* **6**, (2016).
- 2    71.    Demarta-Gatsi, C. *et al.* Immunological memory to blood-stage malaria infection is
- 3            controlled by the histamine releasing factor (HRF) of the parasite. *Sci. Rep.* **7**, (2017).

4

5

6

7

8

9

10

11

12

13

14

15

16

17

18

19

20

21

22

23

Baltayeva *et al*

1 **FIGURE LEGENDS**

2 **Figure 1. Establishment of a mouse model of diet-induced maternal obesity. A)** Schematic diagram  
3 depicting the experimental workflow with low-fat, no sucrose (LFD) or high-fat, high sucrose (HFD)  
4 diet regime, breeding strategy, pregnancy detection at gestational day (Gd) 0.5, and gestational  
5 endpoints (Gd 7.5/10.5/14.5). Shown are uterine horns with multiple conception sites comprised of  
6 utero-placental tissues that were allocated for downstream cellular analyses or histology. **B)** Body  
7 weight gain prior to pregnancy of mice fed either HFD (black bars; n=20) or a matched LFD (grey  
8 bars; n=20). Data represented as mean  $\pm$  SEM. \*p<0.05; \*\*p<0.005. **C)** Body weight distribution of  
9 LFD- and HFD-exposed mice following the 13-week diet regime. Red dashed line represents the mean  
10 LFD weight + 3 SD that was used to subcategorize HFD mice into diet-induced obese (DIO) and diet-  
11 induced obese resistant (DIO-R) groups. **D)** Average weekly weight gain rate (LFD: n=14, HFD:  
12 n=19). Data represented as mean  $\pm$  SD. *P*-values from Student's t-test. **E)** Maternal serum levels of  
13 TNF- $\alpha$  at Gd10.5 in LFD (n=13), HFD (n=16), DIO (n=10), and DIO-R (n=6) mice. Data represented  
14 as mean  $\pm$  SD. *P*-values from Mann-Whitney test. **F)** Proportion of resorbed implantation sites per  
15 mouse observed at Gd14.5 (LFD: n=13, HFD: n=13); Data represented as mean  $\pm$  SD. *P*-values from  
16 Student's t-test.

17



Baltayeva *et al*

1 **Figure 2. HFD exposure does not result in alterations of total uterine leukocytes or subsets of**  
2 **uNK cells. A)** Representative DBA immunofluorescence images of implantation sites at Gd7.5 (LFD:  
3 n=9; HFD: n=13) and Gd10.5 (LFD: n=10; HFD: n=9) and scatter plots showing number of dolichos  
4 biflorus agglutinin (DBA)+ uterine NK cells. Scale bar = 200µm. **B)** Flow cytometry gating strategy  
5 identification and quantification of uterine immune cell populations, including total uNK (CD3e-  
6 /CD45+/CD122+), tissue-resident (tr) (CD122+/CD49a+), conventional (c) (CD122+/DX5+), and uNK  
7 precursors (CD122+/DX5-/NK1.1-). Representative scatter plots of **C)** total leukocyte (CD45+), **D)**  
8 uterine NK, **E)** tr-uNK, **F)** c-uNK, and **G)** uNK precursors in LFD (n=14), HFD (n=18), DIO (n=11),  
9 and DIO-R (n=7) mice. Data represented as mean ± SD; *P*-values from unpaired Student's t-test for  
10 panels A, C-G.

11

12

13

14

Baltayeva *et al*

1 **Figure 3. HFD and diet-induced weight gain alter frequencies of NCR1+ uNK cells. A)**  
2 Representative flow cytometry plots of NCR1+ uNK proportions. Scatter plots show **B)** proportion of  
3 NCR1+ uNK and **C)** NCR1 median fluorescent intensities (MFI) readings within uNK of LFD (n=14)  
4 HFD (n=18), DIO (n=11), and DIO-R (n=7) mice.

5

6

Baltayeva *et al*

1 **Figure 4. High-fat diet and diet-induced weight-gain potentiates uNK activity.** A) Representative  
2 flow cytometry plots and gating strategy for analyzing proportions of CD69-expressing uNK and  
3 NCR1+ uNK. B) Representative MFI histograms and scatter plots showing CD69 expression intensity  
4 (MFI) within uNK. (LFD: n=14; HFD: n=18; DIO: n=11; DIO-R: n=7). C) Representative MFI  
5 histograms and scatter plots showing expression levels of CD69 within NCR1+ uNK of LFD (n=14),  
6 HFD (n=18), DIO (n=11), and DIO-R (n=7) mice. Data represented as mean  $\pm$  SD; *P*-values from  
7 unpaired Student's t-tests for panels B&C.

8

9

Baltayeva *et al*

1 **Figure 5. Exposure to HFD does not affect placental structure.** A) Representative images of H&E-  
2 stained placentas from HFD- and LFD-fed mice with outlined Labyrinth (L), Junctional zone (Jz) and  
3 decidua (D). Scatter plots to the right show total placental area (mm<sup>2</sup>) from LFD, HFD, DIO and DIO-  
4 R groups. Scale bar = 1000µm. Scatter plots showing proportional measurements of **B)** labyrinth, **C)**  
5 junctional zone and **D)** decidual areas relative to total placental area in LFD (n=28), HFD, (n=24), DIO  
6 (n=16), and DIO-R (n=8) mice. Data represented as mean ± SD; *P*-values from unpaired Student's t-  
7 tests for panels A-D.

8

9

10

11

12

13

14

15

Baltayeva *et al*

1 **Figure 6. HFD leads to impaired spiral artery remodeling in mid pregnancy. A)** Images of H&E  
2 stained Gd10.5 implantation sites. Hashed boxes and outlines show locations of spiral arteries being  
3 measured and outline vessel wall and vessel lumen areas. **B)** Arterial wall area ( $\mu\text{m}^2$ ) to lumen area  
4 ( $\mu\text{m}^2$ ) [wall:lumen] ratios from Gd10.5 LFD (n=11), HFD (n=9), DIO (n=4), and DIO-R (n=5) mice.  
5 **C)** Representative immunofluorescence images of Gd7.5 and Gd10.5 implantation sites stained with  
6 antibodies directed against smooth muscle actin (SMA; purple), and DBA (green). Nuclei are stained  
7 with DAPI (white). SMA surrounding arteries is highlighted with yellow dashed-lines, and artery  
8 lumens are indicated with blue-dashed lines. Scale bar = 40 $\mu\text{m}$ . **D)** Arterial SMA layer to arterial  
9 lumen ratios from Gd7.5 LFD (n=13) and HFD (n=15) mice, and in Gd10.5 LFD (n=12) and HFD  
10 (n=19) mice **E)** H&E images of GD14.5 decidual arteries in LFD (n=16), HFD (n=17), DIO (n=11),  
11 and DIO-R (n=6) mice. Scale bar = 100 $\mu\text{m}$ . Data represented as mean  $\pm$  SD; *P*-values from unpaired  
12 Student's t-tests for panels B, D&E.

13

14

Baltayeva *et al*

1 **Figure 7. uNK gene expression profile of DIO and DIO-R vs LFD at Gd10.5.** A) Schematic  
2 diagram depicting the workflow for gene expression analysis. uNK RNA was isolated from Gd10.5  
3 implantation sites and hybridized onto Affymetrix microarray chip followed by analysis in R. B)  
4 Hierarchical clustering of LFD, DIO, and DIO-R uNK using a gene signature derived from nominal *P*-  
5 value ranking ( $P < 0.05$ , fold-change  $> 1.25$ ). Boxplots showing log-transformed, normalized expression  
6 levels for selected genes involved in C) immune function, D) vascular remodeling/angiogenesis and E)  
7 metabolism.

8

Baltayeva *et al*

1 **SUPPLEMENTAL FIGURE LEGENDS**

2 **Supplemental Figure 1.** Scatter plots of **A)** placental and **B)** fetal weights at Gd14.5. (LFD: n=17;  
3 HFD: n=16; DIO: n=10; DIO-R: n=6). **C)** DBA+ cell diameter measurements ( $\mu\text{m}$ ) and  
4 photomicrographs of DBA (DBA: red, DAPI/nuclei: blue) immunofluorescence staining showing the  
5 approach for cell diameter measurements (yellow dashed lines). Scale bar =  $10\mu\text{m}$ . (LFD: n=9 i.s.;  
6 HFD: n=9 i.s.; DIO: n=4 i.s.; DIO-R: n=5 i.s.). Data represented as mean  $\pm$  SD; *P*-values from unpaired  
7 Student's t-test for panels A-C.

8

9

10

11

12

13

14

15

16

17

18

19

20

21

22

23

24

Baltayeva *et al*

1 **Supplemental Figure 2. uNK gene expression analysis. A)** Principal component analysis (PCA) of  
2 raw data, normalized data, filtered data and ComBat batch corrected data. **B)** Volcano plots following  
3 differential gene expression analysis of HFD vs LFD, DIO vs LFD and DIO-R vs LFD groups. **C)** PCA  
4 clustering based on global gene signatures in LFD, DIO and DIO-R groups. **D)** Scatter plot of relative  
5 mRNA expression of *Vegfa* in Gd10.5 uNK (HFD: n=5; LFD: n=5). Data represented as mean  $\pm$  SD;  
6 *P*-values from unpaired Student's t-test.  
7



# Figure 1

A

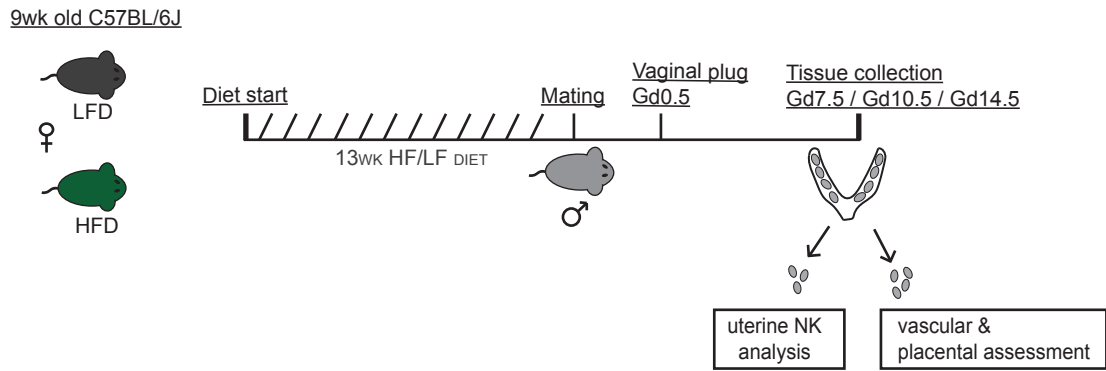

B

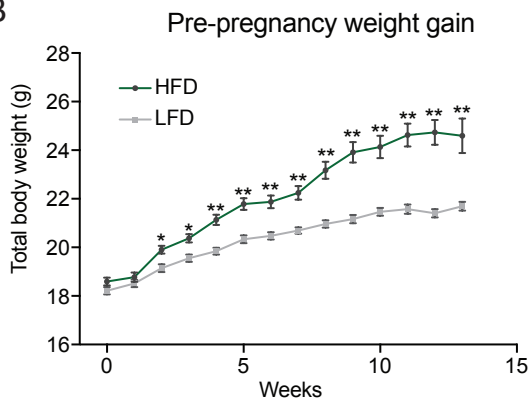

C

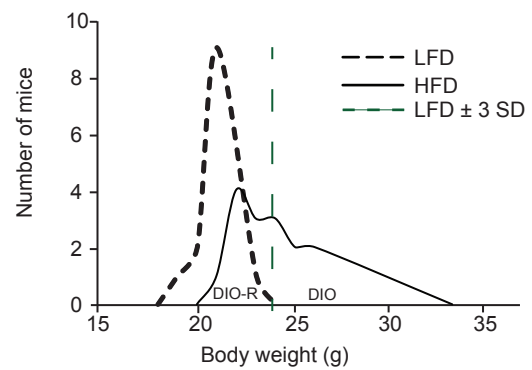

D

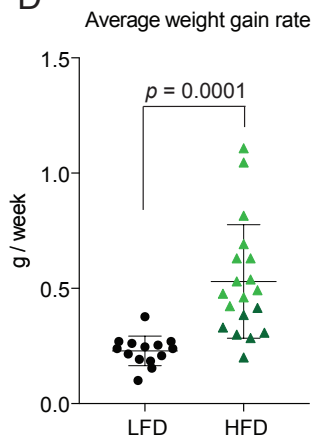

E

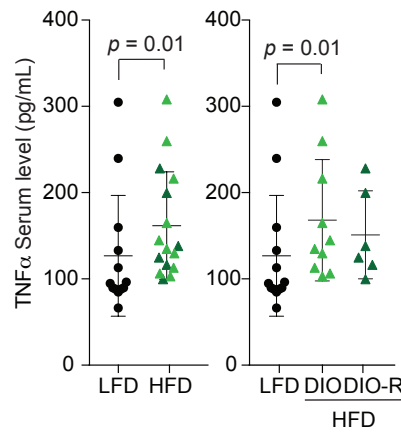

F

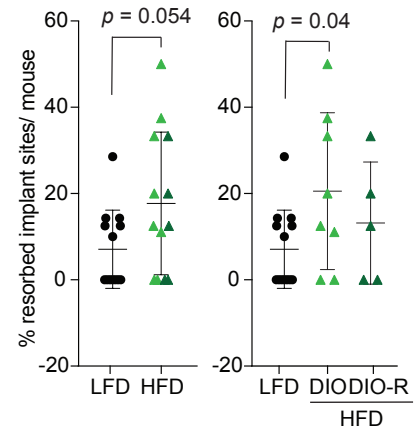

Figure 2

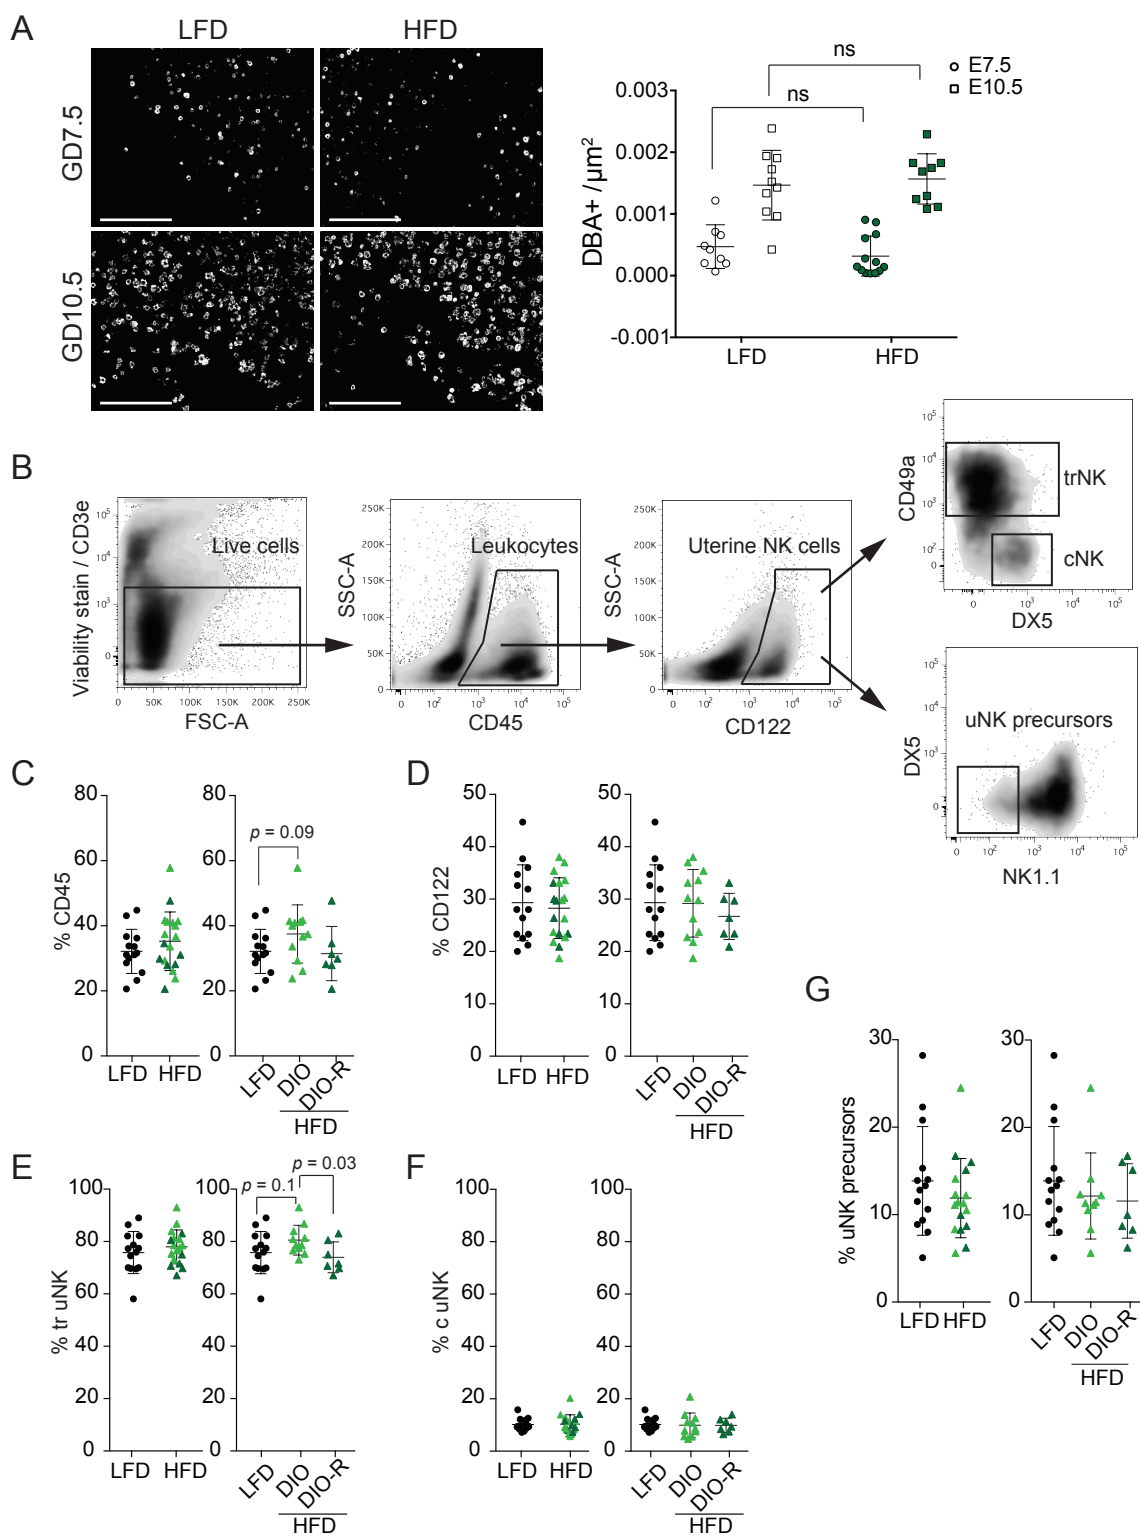

Figure 3

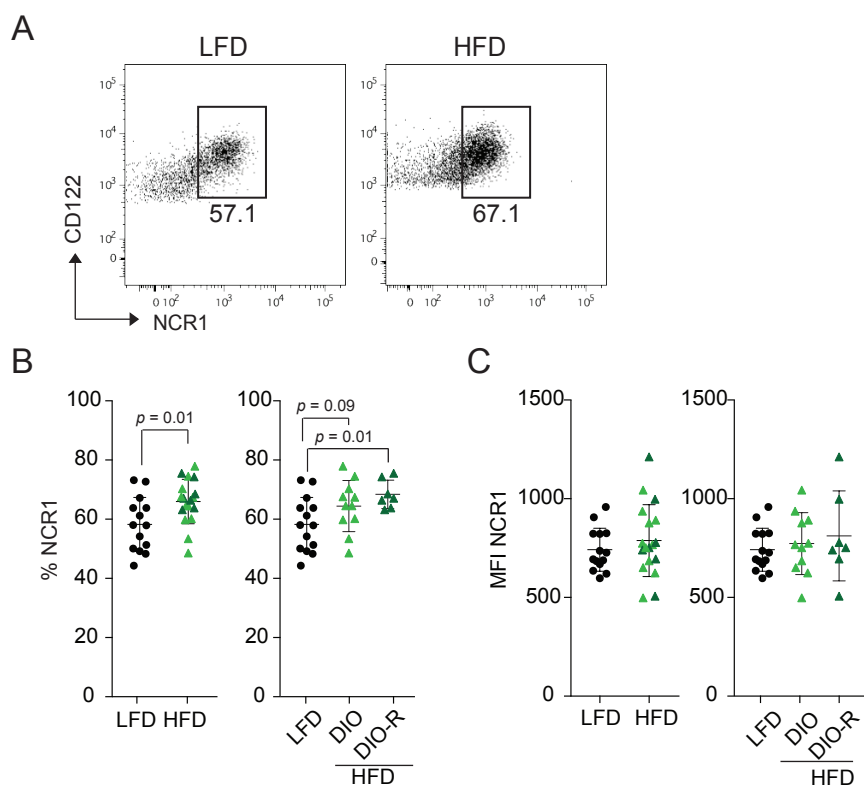

Figure 4

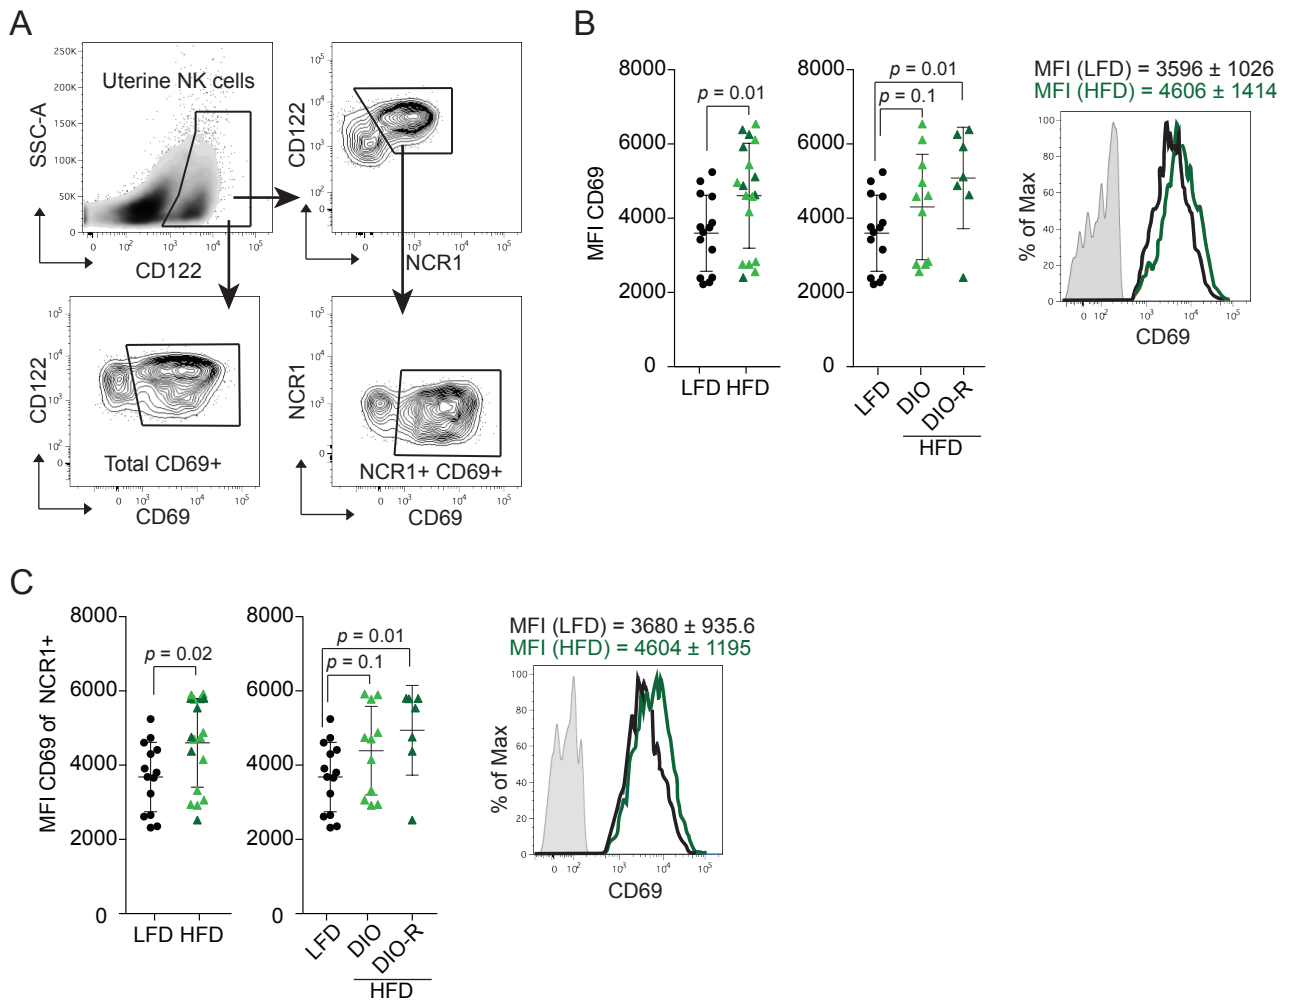

Figure 5

A

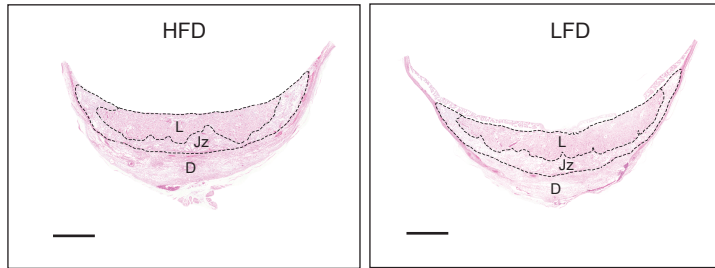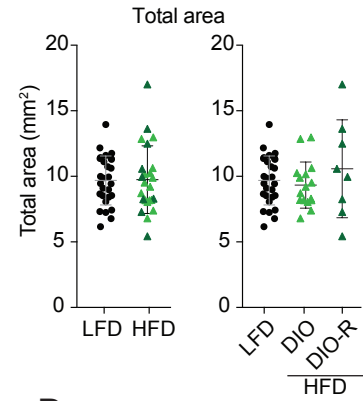

B

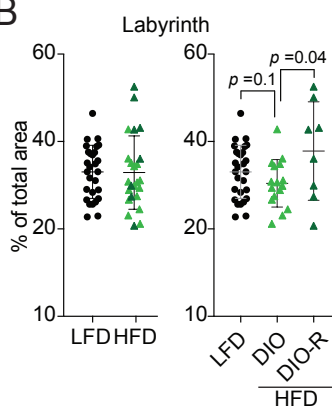

C

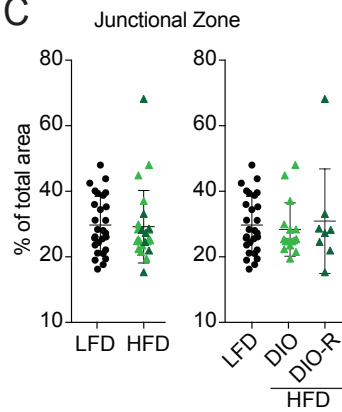

D

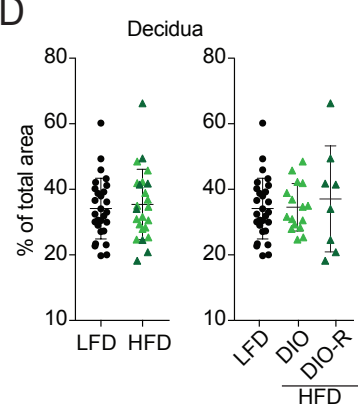

Figure 6

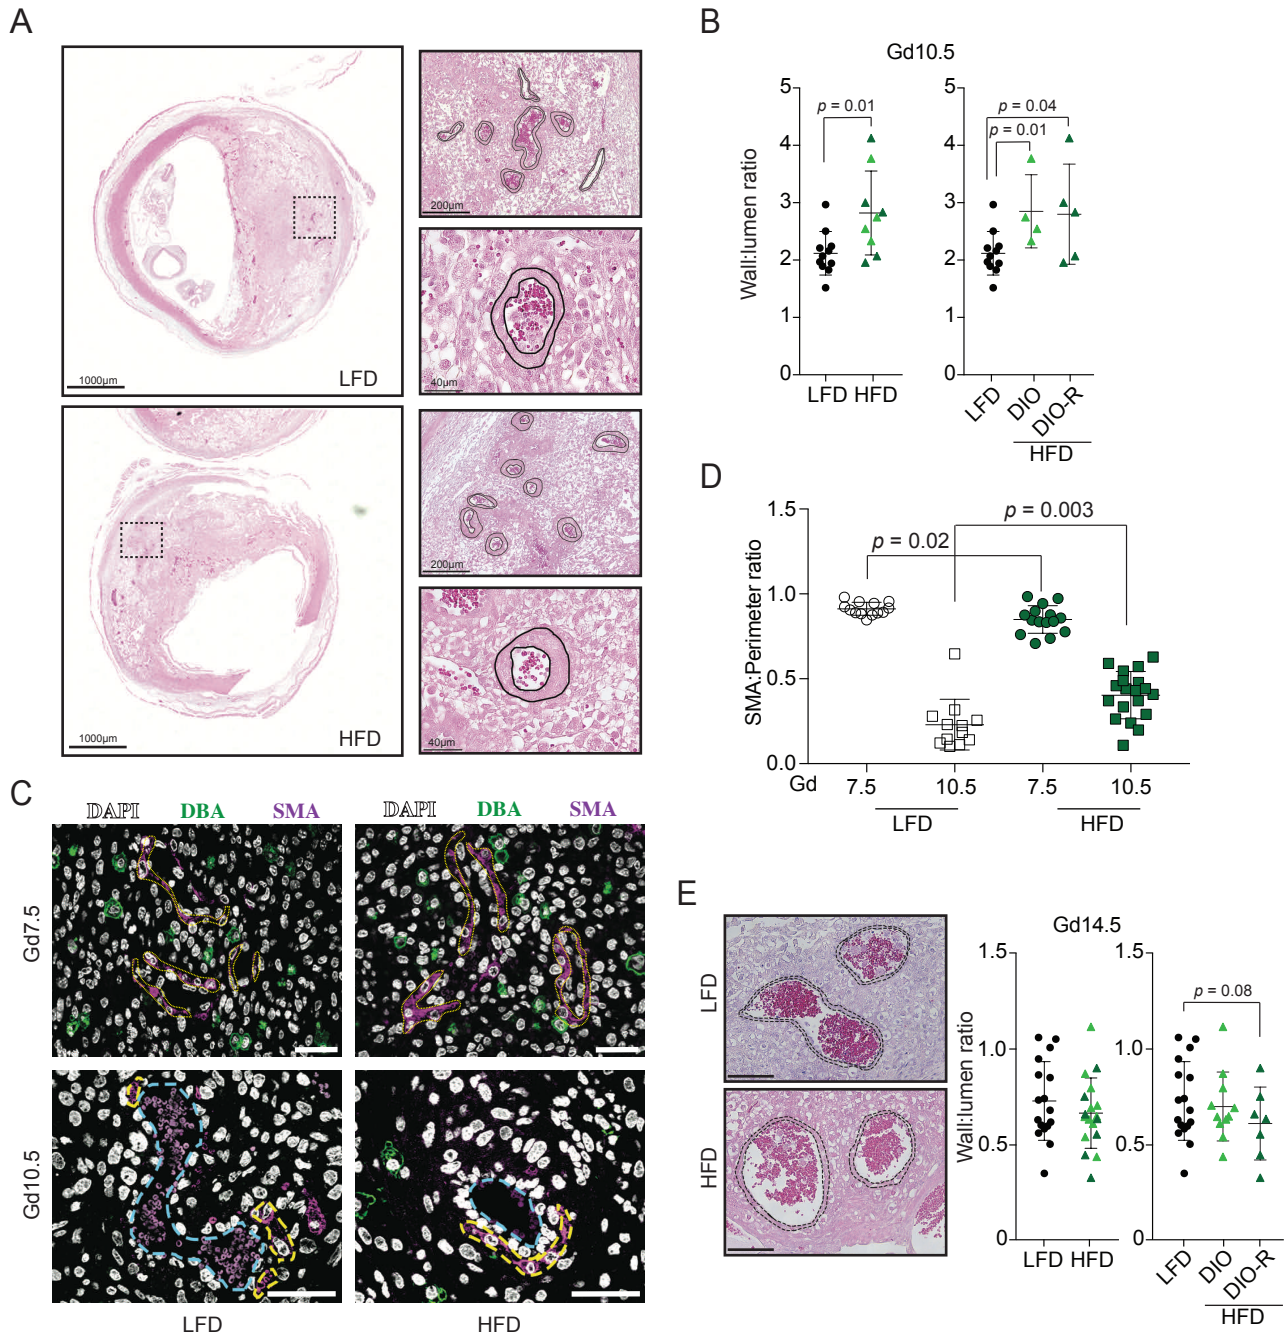

Figure 7

A

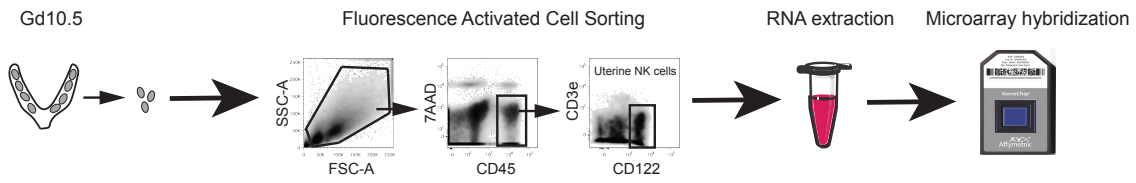

B

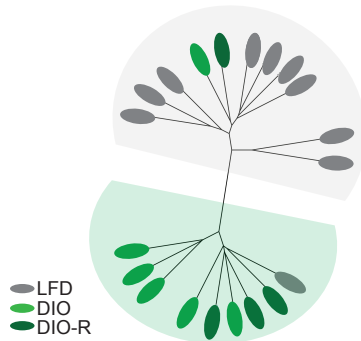

C Cell-mediated immunity

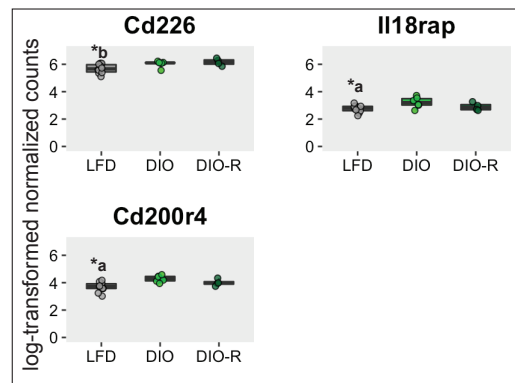

D

Vascular biology

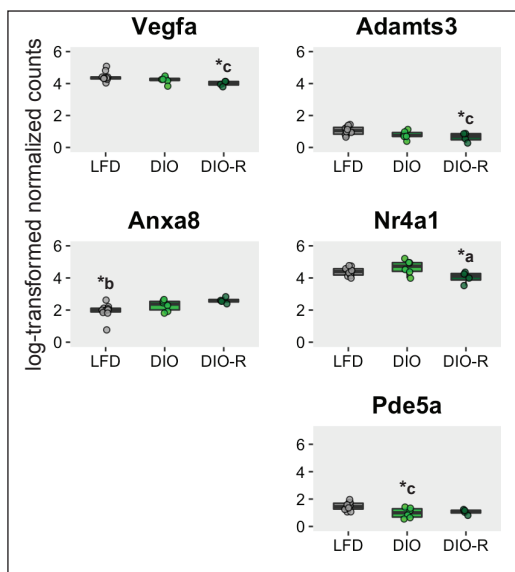

E

Metabolism

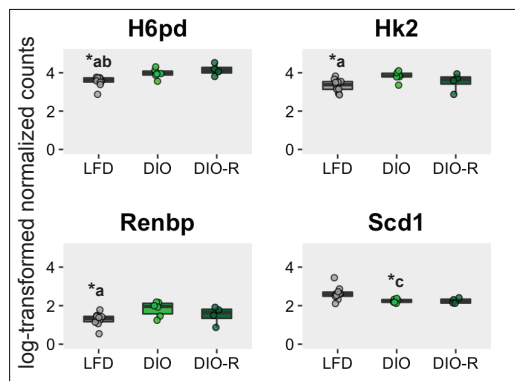

Source: https://www.biorxiv.org/content/10.1101/275503v2.full.pdf
